# Supplementary material for: The Worldwide Variation in Avian Clutch Size across Species and Space
Source: PLOS journal article supplement (doi:10.1371/journal.pbio.0060303), 2008-12-05
Supplement: S1 (10.1371/journal.pbio.0060303.s001) [file journal.pbio.0060303.s001]

Table S1: Cross-correlation matrix of variables in the analysis across all 5,290 species data points (Spearman rank correlations). Only continuous and categorical variables with 2 factors levels included. Correlations  $\geq 0.75$  are marked in bold. For variable abbreviations see Methods.

|                                                | <i>Clutch size</i> | <i>Mass</i>      | <i>Migrant</i>       | <i>Temp<sub>Avg</sub></i>   | <i>NPP<sub>Max</sub></i>   | <i>Temp<sub>Max</sub> - Temp<sub>Min</sub></i> |
|------------------------------------------------|--------------------|------------------|----------------------|-----------------------------|----------------------------|------------------------------------------------|
|                                                | <i>Precocial</i>   | <i>Nest type</i> | <i>Abs. Latitude</i> | <i>Prec<sub>Total</sub></i> | <i>NPP<sub>Total</sub></i> | $1 - (NPP_{Min} / NPP_{Max})$                  |
| <i>Clutch size</i>                             | 0.24               | 0.08             | 0.13                 | 0.33                        | 0.47                       | -0.39                                          |
| <i>Precocial</i>                               | 0.24               | 0.45             | -0.20                | 0.17                        | 0.16                       | -0.13                                          |
| <i>Mass</i>                                    | 0.08               | 0.45             | -0.03                | 0.07                        | 0.08                       | -0.01                                          |
| <i>Nest type</i>                               | 0.13               | -0.20            | -0.03                | -0.22                       | -0.15                      | 0.16                                           |
| <i>Migrant</i>                                 | 0.33               | 0.17             | 0.07                 | -0.15                       | 0.51                       | -0.51                                          |
| <i>Abs. Latitude</i>                           | 0.47               | 0.16             | 0.08                 | 0.16                        | 0.51                       | <b>-0.76</b>                                   |
| <i>Temp<sub>Avg</sub></i>                      | -0.39              | -0.13            | -0.01                | 0.11                        | -0.51                      | <b>-0.76</b>                                   |
| <i>Prec<sub>Total</sub></i>                    | -0.38              | -0.16            | -0.08                | 0.13                        | -0.41                      | -0.63                                          |
| <i>NPP<sub>Total</sub></i>                     | -0.43              | -0.16            | -0.10                | 0.05                        | -0.41                      | -0.69                                          |
| <i>NPP<sub>Max</sub></i>                       | -0.16              | -0.07            | -0.08                | 0.12                        | -0.12                      | -0.25                                          |
| $1 - (NPP_{Min} / NPP_{Max})$                  | -0.46              | -0.17            | -0.09                | -0.16                       | -0.46                      | -0.73                                          |
| <i>Temp<sub>Max</sub> - Temp<sub>Min</sub></i> | 0.52               | 0.17             | 0.11                 | -0.08                       | 0.55                       | <b>0.90</b>                                    |
